# Supplementary material for: Recombinant fusion protein by lysozyme and antibacterial peptide enhances ischemic wound healing via angiogenesis and reduction of inflammation in diabetic db/db mice
Source: PeerJ journal article supplement (doi:10.7717/peerj.11256), 2021-04-16
Supplement: raw_data_1.zip [file raw_data_1.zip]

## Sheet: Sheet1
	Actin	NONISCH	22.2982	22.1502	21.631	23.3958	23.4781	23.4628	22.9779	23.2102	23.2969
		NONISCH+PROT	25.3227	25.301	25.1293	22.1727	21.4088	22.7611	18.9376	19.0514	19.2155
		ISCH	22.6873	21.0253	22.0135	22.7411	23.5038	22.0838	27.1691	27.6161	26.3431
		ISCH+PROT	22.8851	22.7983	22.6031	21.8505	21.3101	20.6925	22.3328	22.3029	21.4395
	VEGF	NONISCH	27.4605	27.54	27.1277	29.7205	29.5653	28.5603	30.2806	29.6259	29.0003
		NONISCH+PROT	33.2552	34.6501	34.7863	28.355	29.2182	30.0943	26.4503	26.7752	26.9195
		ISCH	25.6694	25.6614	25.4225	24.3807	23.9578	23.477	28.1959	28.1182	27.952
		ISCH+PROT	29.0381	30.0878	28.1853	27.0078	26.9787	26.1824	27.6867	27.9712	26.5722
	PDGF	NONISCH	28.0335	27.9372	27.4768	30.0936	29.3983	29.4387	28.424	28.2693	28.171
		NONISCH+PROT	35.6577	34.0031	33.3893	31.3702	31.3318	32.4971	25.5709	25.5286	25.4675
		ISCH	26.3316	26.4674	26.1055	27.1321	26.7627	26.5589	25.7592	26.0916	26.5182
		ISCH+PROT	30.1518	30.384	29.2132	26.0038	25.7902	25.8193	26.698	26.7051	26.7481
	FGF	NONISCH	31.3679	32.1253	31.298	34.1826	34.6535	32.9094	30.6895	30.2246	29.6763
		NONISCH+PROT	37.1928	36.9524	37.9234	32.8473	33.0335	33.2105	27.3011	27.5443	27.8675
		ISCH	29.5316	29.1472	28.3668	28.7283	28.3896	28.1618	33.2742	31.4309	32.6789
		ISCH+PROT	32.6298	33.9466	35.4624	29.8942	29.1306	28.5386	30.6868	30.3296	29.9545
	eNOS	NONISCH	33.4053	32.8004	33.9036	36.1614	39.215	37.7588	34.3547	34.7348	35.8266
		NONISCH+PROT	38.1293	38.9276	35.7962	38.091	38.9249	37.9562	30.2308	30.3725	30.7093
		ISCH	32.1483	33.1118	31.1793	33.0454	32.2617	32.0621	34.7947	35.0554	35.2443
		ISCH+PROT	35.8072	36.5064	33.7437	36.1763	35.0745	35.8284	31.9464	32.1114	31.3545
	HIF	NONISCH	29.5766	29.155	28.944	29.1831	29.1533	29.9127	34.1351	31.0814	31.0388
		NONISCH+PROT	35.0128	36.7041	34.0361	29.3483	29.2079	28.2834	23.1483	23.2915	23.3893
		ISCH	26.3436	26.6393	26.3172	25.8389	25.715	25.6481	28.6751	29.1198	28.0923
		ISCH+PROT	30.6389	30.1311	29.9583	26.8506	26.602	26.0351	28.5451	27.8943	26.0937

## Sheet: Sheet2
	VEGF	NONISCH	1.23151	1.24333	1.25411	1.27033	1.25927	1.21726	1.31781	1.27642	1.24481
		NONISCH+PROT	1.31326	1.36952	1.38429	1.27882	1.36478	1.32218	1.39671	1.40542	1.40093
		ISCH	1.13144	1.2205	1.15486	1.0721	1.01932	1.06309	1.03779	1.01818	1.06107
		ISCH+PROT	1.26886	1.31974	1.24697	1.23603	1.26601	1.26531	1.23973	1.25415	1.2394
	PDGF	NONISCH	1.25721	1.26126	1.27025	1.28628	1.25216	1.2547	1.23701	1.21797	1.20922
		NONISCH+PROT	1.40813	1.34394	1.3287	1.41481	1.4635	1.42775	1.35027	1.33999	1.32536
		ISCH	1.16063	1.25884	1.18589	1.19309	1.13865	1.20264	0.948106	0.944797	1.00665
		ISCH+PROT	1.31753	1.33273	1.29244	1.19008	1.21023	1.24776	1.19546	1.19738	1.24761
	FGF	NONISCH	1.40675	1.45034	1.4469	1.46106	1.47599	1.40262	1.33561	1.30221	1.27383
		NONISCH+PROT	1.46875	1.46051	1.50913	1.48143	1.54299	1.45909	1.44163	1.44579	1.45026
		ISCH	1.30168	1.38629	1.28861	1.26328	1.20787	1.27522	1.22471	1.13814	1.24051
		ISCH+PROT	1.42581	1.489	1.56892	1.36812	1.36699	1.37918	1.37407	1.35989	1.39716
	eNOS	NONISCH	1.49812	1.48082	1.56736	1.54564	1.67028	1.6093	1.49512	1.49653	1.53783
		NONISCH+PROT	1.50574	1.53858	1.42448	1.71792	1.81817	1.66759	1.59634	1.59424	1.59815
		ISCH	1.41702	1.57486	1.41637	1.45311	1.37262	1.45184	1.28067	1.26938	1.33789
		ISCH+PROT	1.56465	1.60128	1.49288	1.65563	1.64591	1.73147	1.43047	1.43979	1.46246
	HIF	NONISCH	1.32641	1.31624	1.33808	1.24736	1.24172	1.2749	1.48556	1.33913	1.33231
		NONISCH+PROT	1.38266	1.4507	1.35444	1.32362	1.36429	1.24262	1.22235	1.22256	1.21721
		ISCH	1.16116	1.26701	1.1955	1.13622	1.09408	1.1614	1.05543	1.05445	1.0664
		ISCH+PROT	1.33881	1.32164	1.32541	1.22883	1.24833	1.25819	1.27817	1.2507	1.21709
